# Supplementary figures and images for: Hesperetin attenuates sepsis-induced intestinal barrier injury by regulating neutrophil extracellular trap formation via the ROS/autophagy signaling pathway
Source: Royal Society of Chemistry journal article supplement (doi:10.1039/d2fo02707k), 2023-01-01

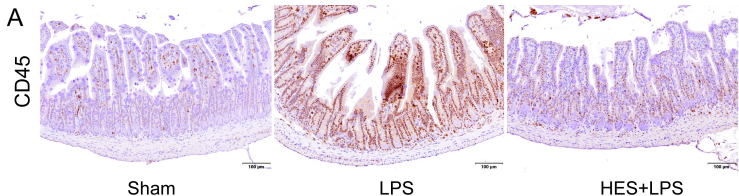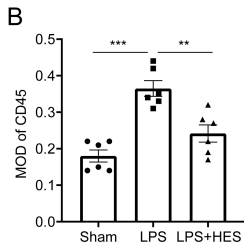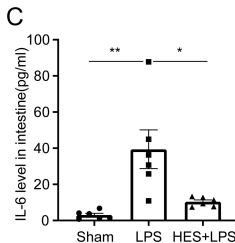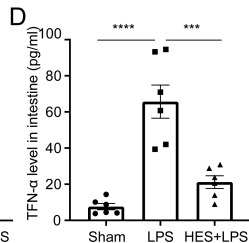

Supplement: d2fo02707k2.pdf [file d2fo02707k2.pdf]

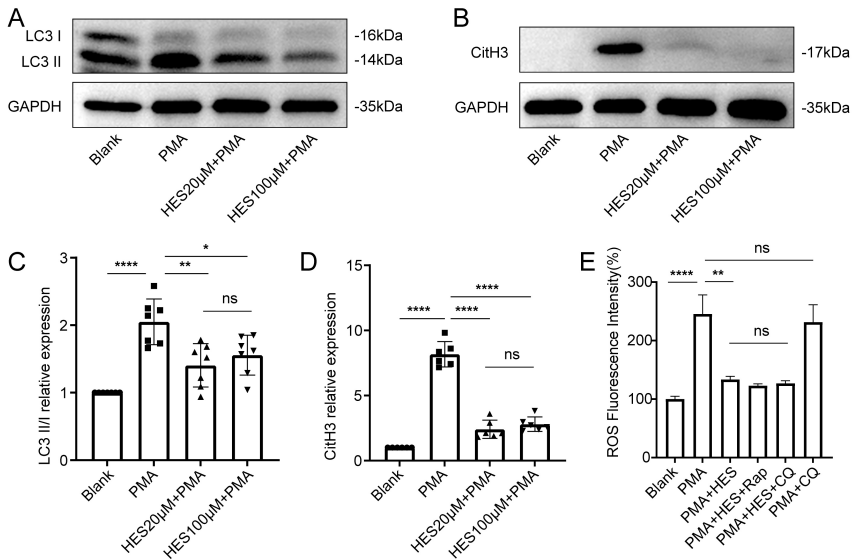

Supplement: d2fo02707k3.pdf [file d2fo02707k3.pdf]
